# Supplementary material for: High topological tri-metal phosphide of CoP@FeNiP toward enhanced activities in oxygen evolution reaction
Source: Royal Society of Chemistry journal article supplement (doi:10.1039/d0nr06615j), 2020-12-15
Supplement: d0nr06615j1.pdf [file d0nr06615j1.pdf]

# **High Topological Tri-metal Phosphide of CoP@FeNiP Toward Enhanced Activities in Oxygen Evolution Reaction**

Jianzhi Wang<sup>†</sup>, Chen Chen<sup>†</sup>, Ning Cai, Miao Wang, Hui Li and Faquan Yu\*

[<sup>†</sup>] These authors contributed equally to this work.

Key Laboratory for Green Chemical Process of Ministry of Education,  
Hubei Key Laboratory for Novel Reactor and Green Chemistry  
Technology,

Hubei Engineering Research Center for Advanced Fine Chemicals,

School of Chemical Engineering and Pharmacy, Wuhan Institute of

Technology, Wuhan 430205, China

No. 206, Guanggu 1st Road, Wuhan 430205, Hubei, China

E-mail: [fyu@wit.edu.cn](mailto:fyu@wit.edu.cn), [fyuwucn@gmail.com](mailto:fyuwucn@gmail.com)

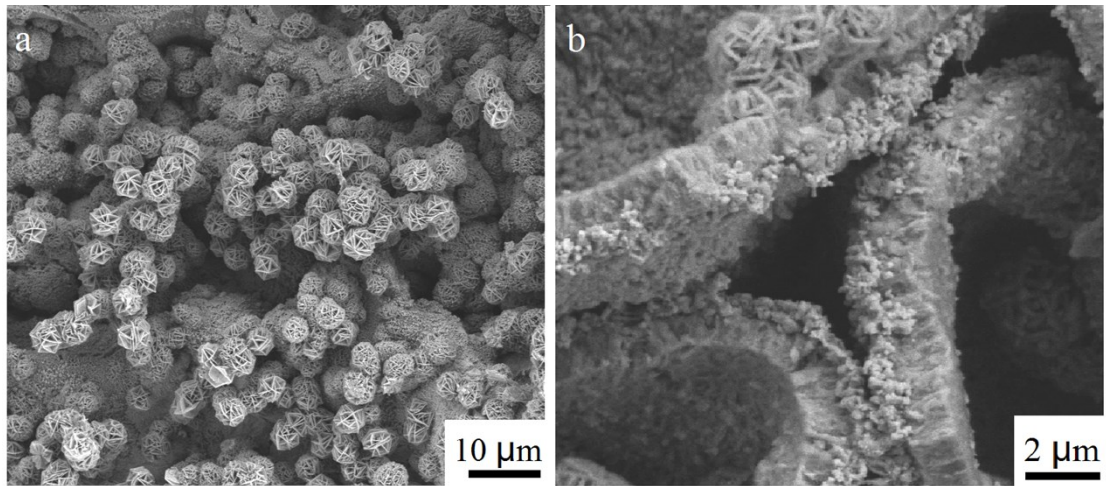

Figure S1. The SEM images of the FeNi LDH/NF with the addition of PVP.

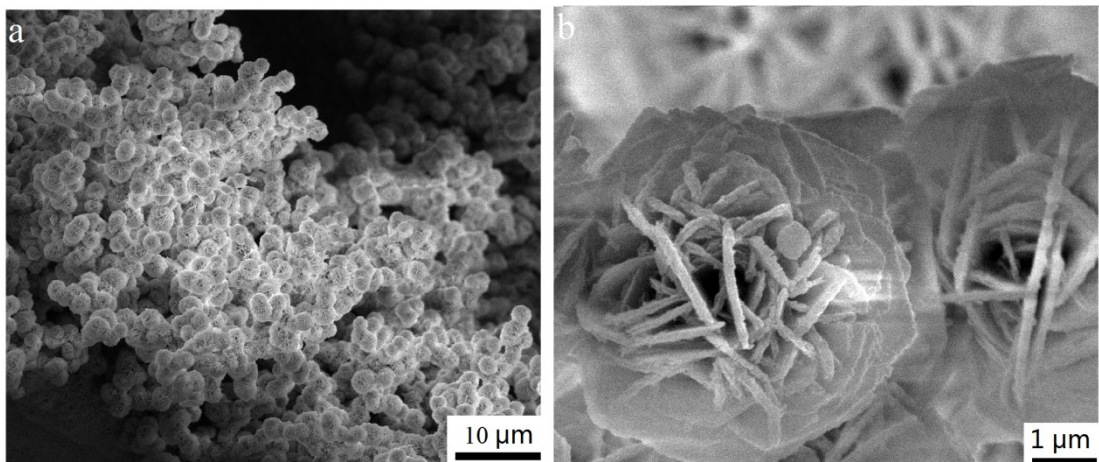

Figure S2. The SEM images of ZIF-67@FeNi LDH/NF without the addition of PVP.

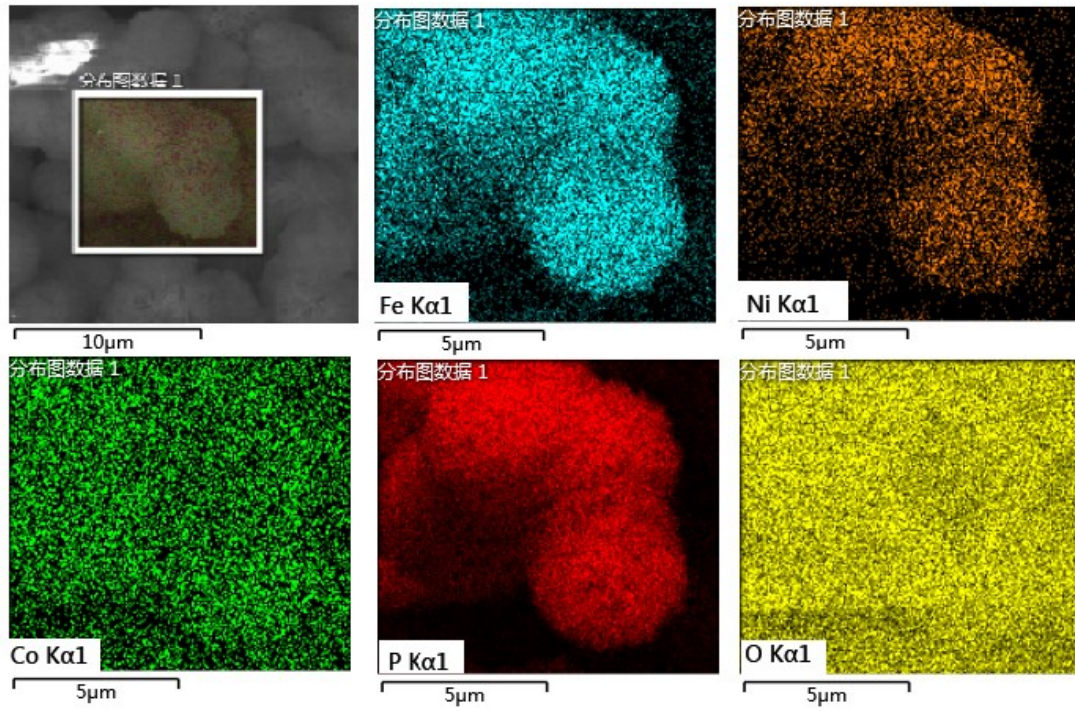

Figure S3. EDX mappings from Fe K $\alpha$ , Ni K $\alpha$ , Co K $\alpha$ , and P K $\alpha$  of CoP@FeNiP/NF.

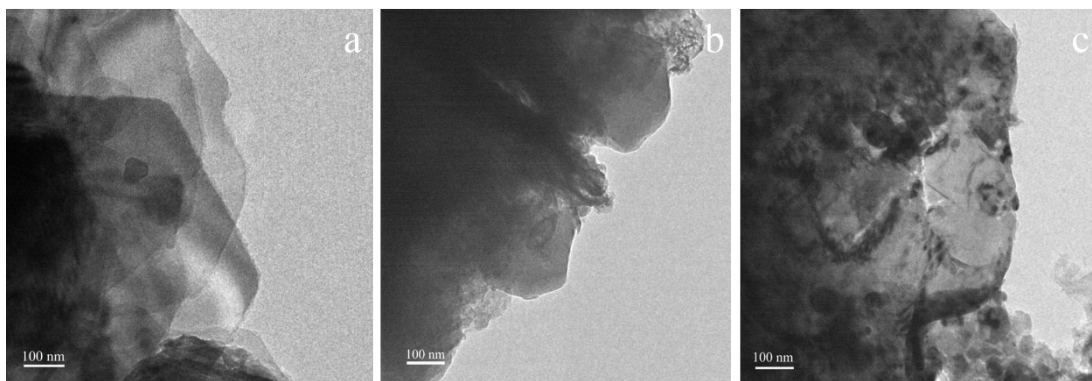

Figure S4. TEM images of the (a) FeNi LDH, (b) ZIF-67@FeNi LDH/NF and (c) FeNiP/NF.

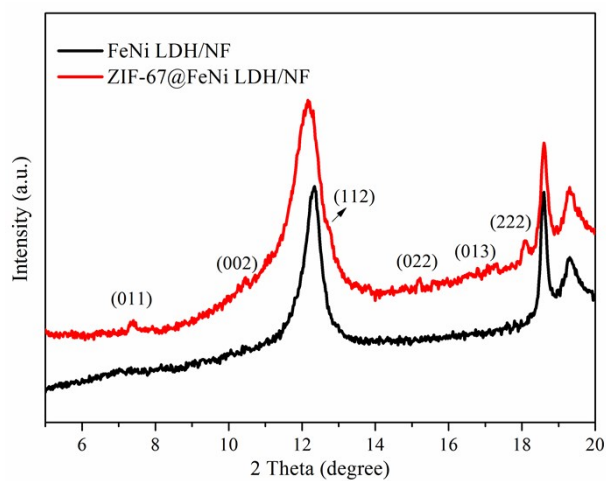

Figure S5. XRD patterns of FeNi LDH/NF and ZIF-67@FeNi LDH/NF at  $\theta = 5-20^\circ$ .

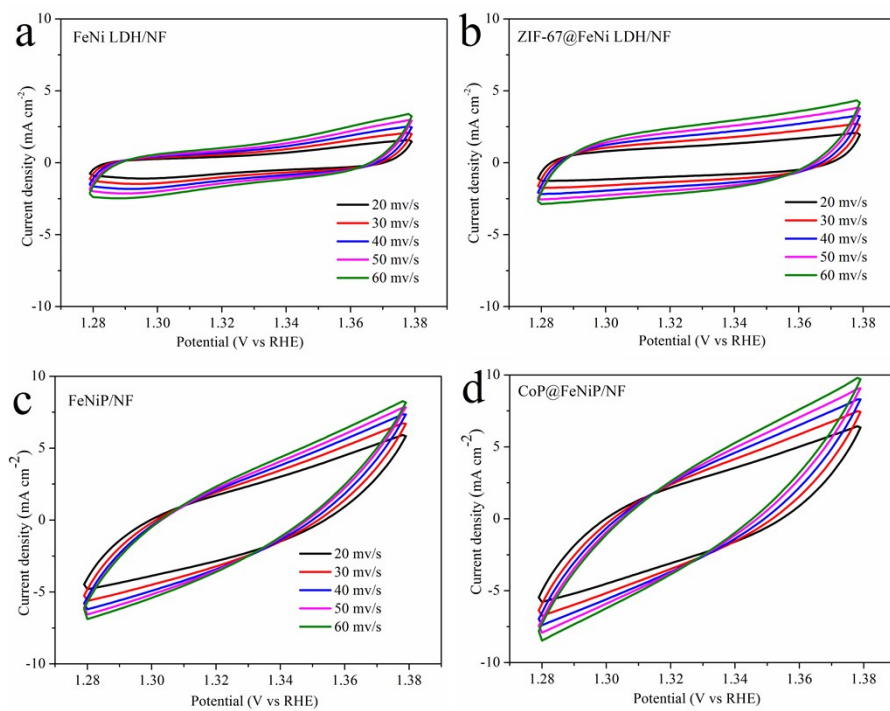

Figure S6. CV curves of (a) FeNi LDH, (b) ZIF-67@FeNi LDH/NF, (c) FeNiP/NF and (d) CoP@FeNiP/NF electrodes at different scan rates.



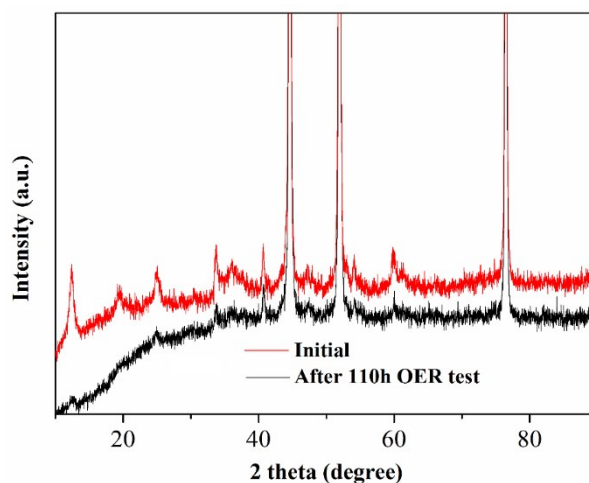

Figure S7. XRD patterns of CoP@FeNiP/NF before and after 110h OER stability test.

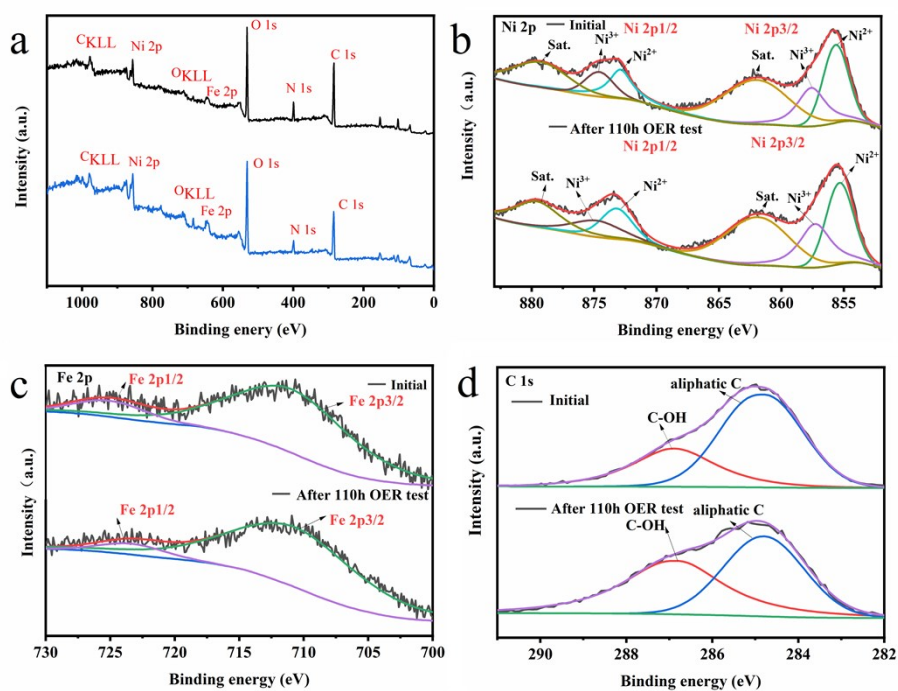

Figure S8. XPS spectra of FeNi-LDH before and after 110h OER stability test.

Table 1. A comparison of OER properties of various transition metal compounds.

| LDH derivative electrocatalysts             | Electrolyte | Current density [mA cm <sup>-2</sup> ] | Overpotential for OER [mV] | Tafel slope [mV decade <sup>-1</sup> ] | Ref      |
|---------------------------------------------|-------------|----------------------------------------|----------------------------|----------------------------------------|----------|
| Fe-CoOOH/G                                  | 1 M KOH     | 10                                     | 330                        | 37                                     | [1]      |
| Fe-doped CoP                                | 1 M KOH     | 10                                     | 230                        | 67                                     | [2]      |
| NiCoP                                       | 1 M KOH     | 10                                     | 280                        | 87                                     | [3]      |
| Ni <sub>3</sub> FeN                         | 1 M KOH     | 10                                     | 280                        | 46                                     | [4]      |
| Fe-Ni <sub>3</sub> S <sub>2</sub> /FeNi     | 1 M KOH     | 10                                     | 282                        | 54                                     | [5]      |
| Ni-Fe-OH@Ni <sub>3</sub> S <sub>2</sub> /NF | 1 M KOH     | 100                                    | 300                        | 93                                     | [6]      |
| CuCo <sub>2</sub> S <sub>4</sub>            | 1 M KOH     | 10                                     | 310                        | 86                                     | [7]      |
| CoP@FeNiP/NF                                | 1 M KOH     | 100                                    | 283                        | 32                                     | Our work |

## References

- [1] X. Han, C. Yu, S. Zhou, C. Zhao, H. Huang, J. Yang, Z. Liu, J. Zhao, J. Qiu, *Advanced Energy Materials* **2017**, 7(14), 1602148.
- [2] C. Tang, R. Zhang, W. Lu, L. He, X. Jiang, A. M. Asiri, X. Sun, *Advanced materials* **2017**, 29(2), 1602441.
- [3] H. Liang, A. N. Gandi, D. H. Anjum, X. Wang, U. Schwingenschlögl, H. N. Alshareef, *Nano letters* **2016**, 16(12), 7718-7725.
- [4] X. Jia, Y. Zhao, G. Chen, L. Shang, R. Shi, X. Kang, G. I. Waterhouse, L. Z. Wu, C. H. Tung, T. Zhang, *Advanced Energy Materials* **2016**, 6(10), 1502585.
- [5] C. Z. Yuan, Z. T. Sun, Y. F. Jiang, Z. K. Yang, N. Jiang, Z. W. Zhao, U. Y. Qazi, W. H. Zhang, A. W. Xu, *Small* **2017**, 13(18), 1604161.
- [6] X. Zou, Y. Liu, G. D. Li, Y. Wu, D. P. Liu, W. Li, H. W. Li, D. Wang, Y. Zhang, X. Zou, *Advanced Materials* **2017**, 29(22), 1700404.
- [7] M. Chauhan, K. P. Reddy, C. S. Gopinath, S. Deka, *ACS Catalysis* **2017**, 7(9), 5871-5879.
